# Supplementary material
Source: Springer Nature journal article supplement (https://www.springermedizin.de/resource/supplementary/12933_2013_641_MOESM1_ESM.pdf/9539058)
Supplement: MOESM1 [file 9539058]

## Additional Material

**Figure 1**

Cumulative incidence curves for (A) all-cause and (B) cardiovascular disease (CVD) mortality based on increasing serum albumin quartiles (Q1-Q4 scored in order of decreasing albumin concentrations).

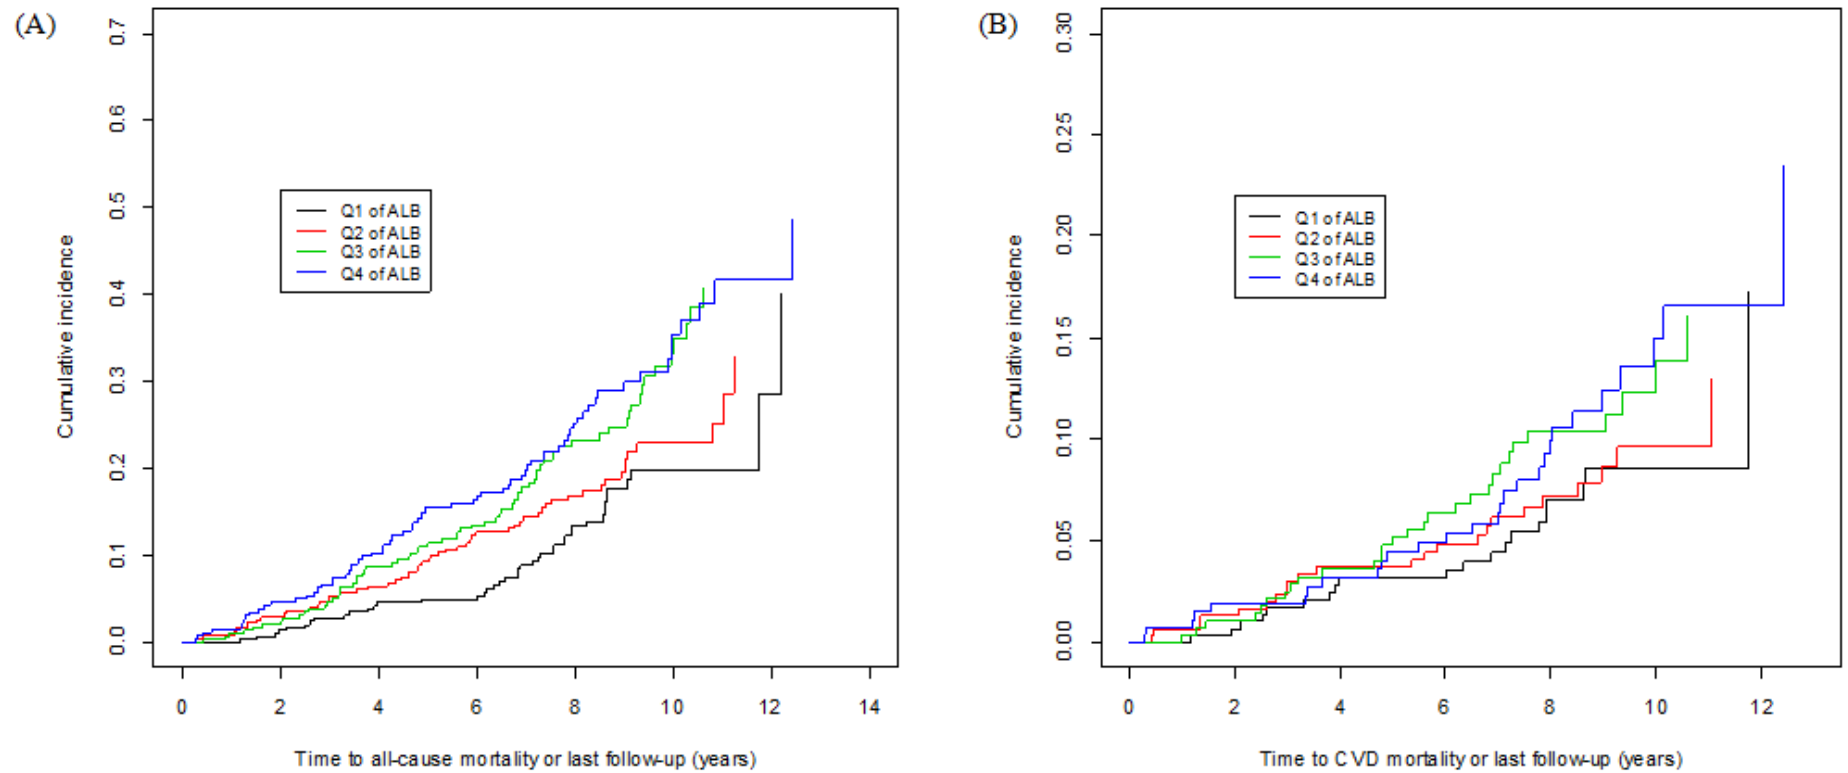

**Figure 2**

Cumulative incidence curves for (A) all-cause and (B) cardiovascular disease (CVD) mortality based on increasing serum creatinine quartiles (Q1-Q4, scored in order of increasing creatinine concentrations).

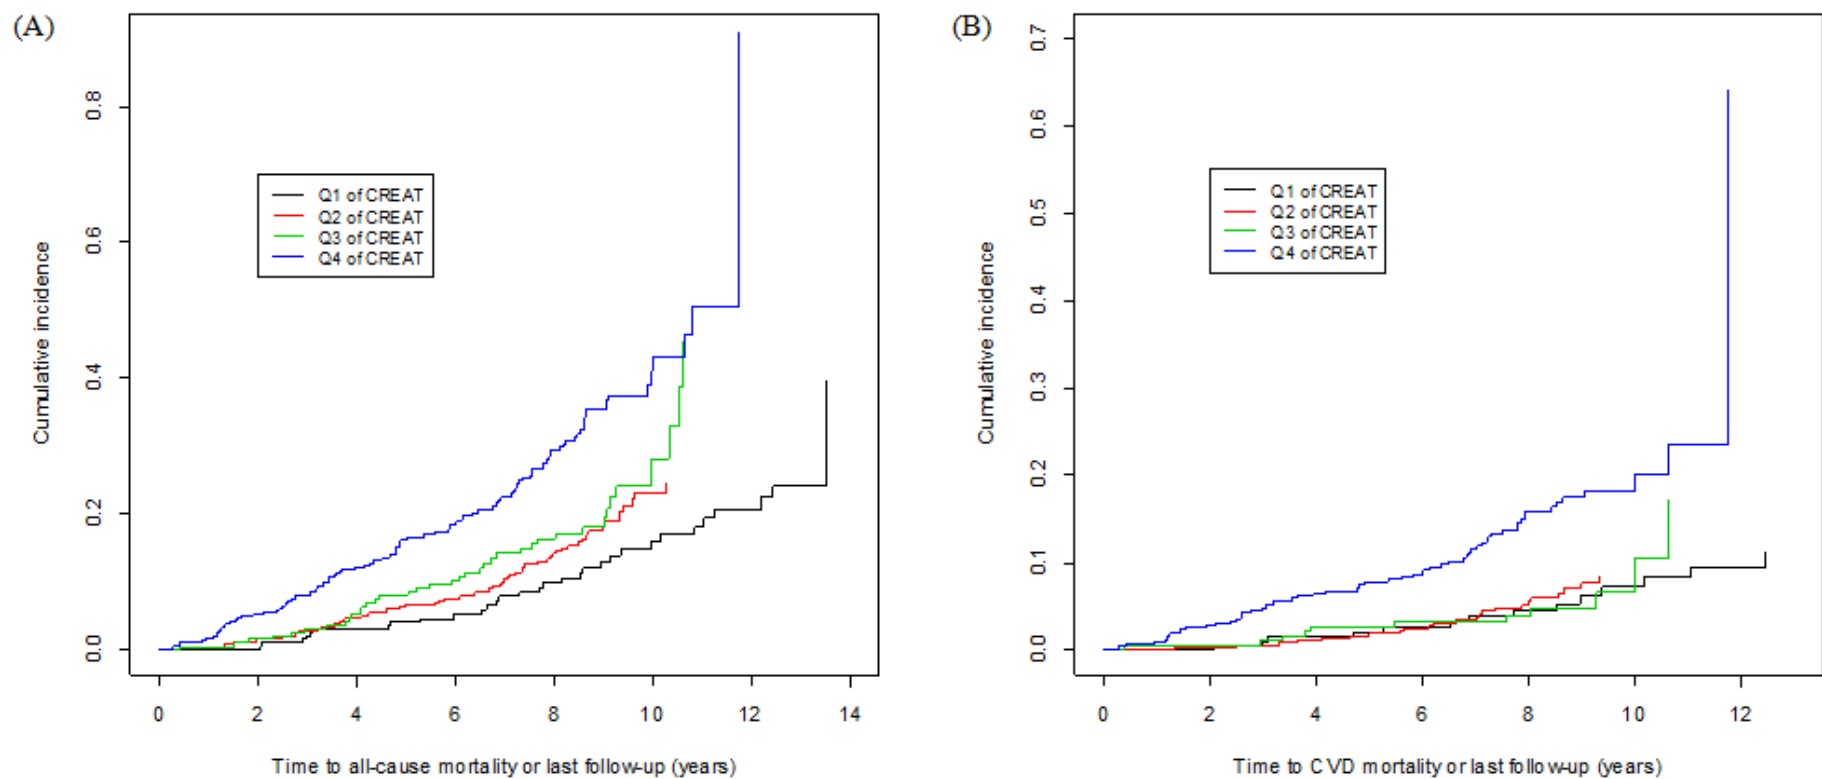

**Figure 3**

Cumulative incidence curves for (A) all-cause and (B) cardiovascular disease (CVD) mortality based on increasing urinary albumin:creatinine ratio (UACR) quartiles (Q1-Q4 scored in order of increasing UACR).

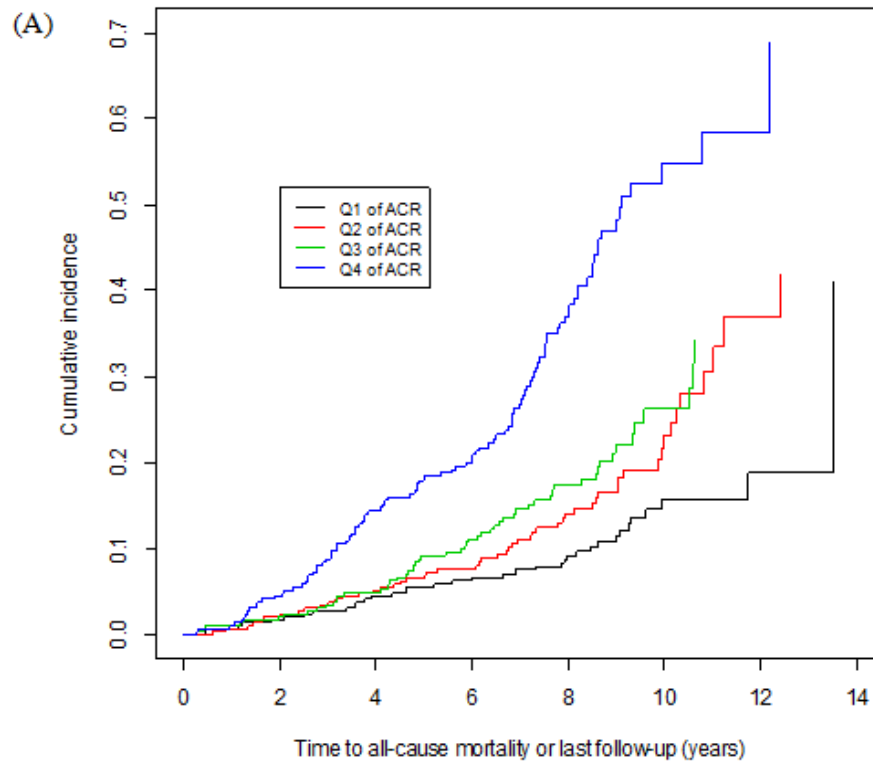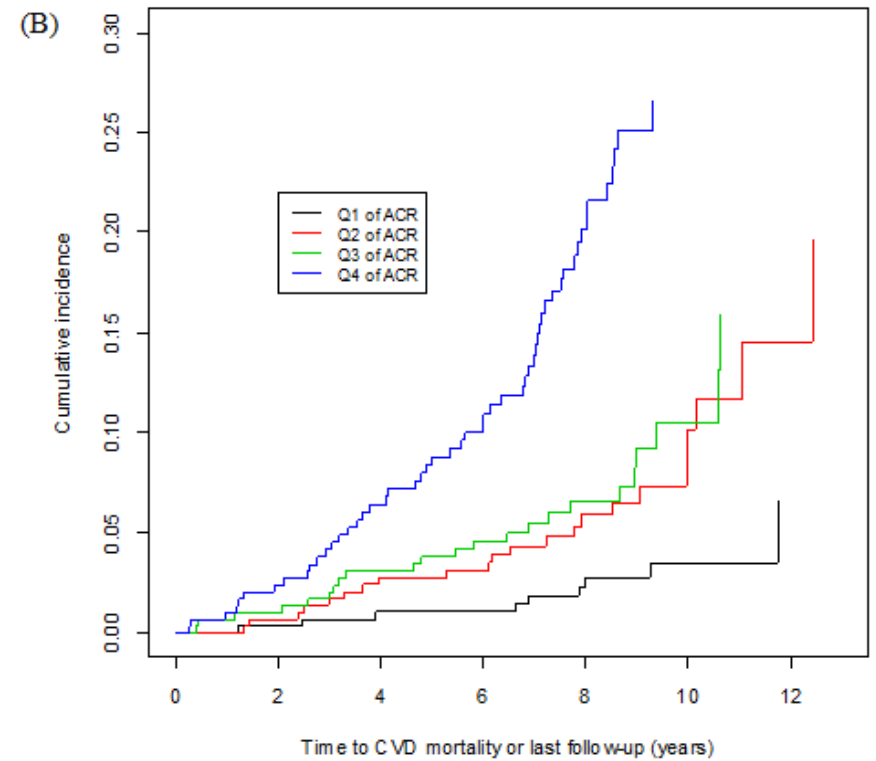

**Figure 4**

Cumulative incidence curves for (A) all-cause and (B) cardiovascular disease (CVD) mortality based on increasing estimated glomerular filtration rate (eGFR) quartiles (Q1-Q4 scored in order of decreasing eGFR).

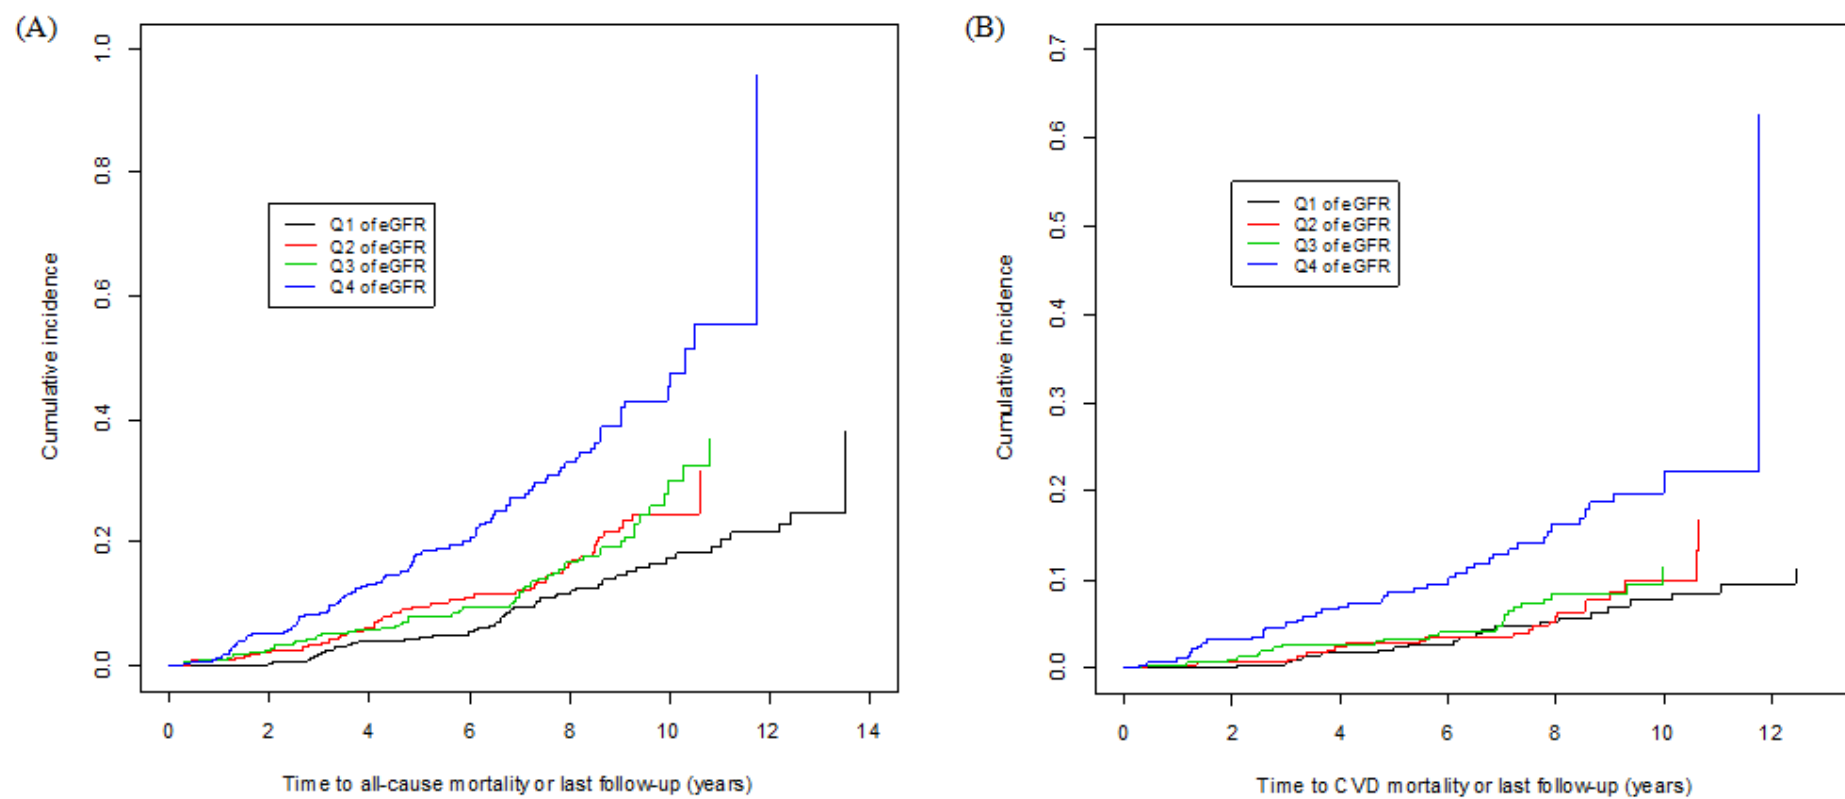

**Table 1**

Test for trend between ordinal measures of kidney disease and mortality in unadjusted models **for T2D affected individuals only.**

|                  | All                        |                        | T2D only         |                        |
|------------------|----------------------------|------------------------|------------------|------------------------|
|                  | HR (CI)                    | p-value                | HR (CI)          | p-value                |
|                  | <b>All-cause Mortality</b> |                        |                  |                        |
| Serum Albumin    | 0.82 (0.73-0.92)           | 0.0005                 | 0.78 (0.69-0.88) | 7.56x10 <sup>-5</sup>  |
| Serum Creatinine | 1.42 (1.26-1.60)           | 2.47x10 <sup>-7</sup>  | 1.39 (1.22-1.57) | 2.94x10 <sup>-7</sup>  |
| UACR             | 1.55 (1.37-1.74)           | 1.18x10 <sup>-12</sup> | 1.47 (1.30-1.67) | 1.26x10 <sup>-9</sup>  |
| eGFR             | 0.71 (0.63-0.81)           | 1.07x10 <sup>-7</sup>  | 0.72 (0.64-0.82) | 6.72x10 <sup>-7</sup>  |
|                  | <b>CVD Mortality</b>       |                        |                  |                        |
| Serum Albumin    | 0.85 (0.71-1.02)           | 0.09                   | 0.82 (0.68-0.99) | 0.04                   |
| Serum Creatinine | 1.55 (1.28-1.88)           | 6.51x10 <sup>-6</sup>  | 1.51 (1.25-1.83) | 2.92x10 <sup>-5</sup>  |
| UACR             | 1.87 (1.55-2.26)           | 1.10x10 <sup>-10</sup> | 1.85 (1.52-2.25) | 6.75x10 <sup>-10</sup> |
| eGFR             | 0.69 (0.58-0.83)           | 5.86x10 <sup>-5</sup>  | 0.69 (0.57-0.83) | 9.44x10 <sup>-5</sup>  |

**Table 2**

Association between continuous measures of kidney disease and mortality with covariate adjustment as indicated **for T2D affected individuals only.**

|                     | Unadjusted       |                        | Partially Adjusted* |                       | Fully Adjusted†  |                       | Fully Adjusted† + CAC |                       |
|---------------------|------------------|------------------------|---------------------|-----------------------|------------------|-----------------------|-----------------------|-----------------------|
|                     | HR (CI)          | p-value                | HR (CI)             | p-value               | HR (CI)          | p-value               | HR (CI)               | p-value               |
| All-cause Mortality |                  |                        |                     |                       |                  |                       |                       |                       |
| Serum Albumin       | 0.71 (0.62-0.81) | 3.34x10 <sup>-7</sup>  | 0.69 (0.60-0.80)    | 3.48x10 <sup>-7</sup> | 0.68 (0.59-0.79) | 5.15x10 <sup>-7</sup> | 0.68 (0.58-0.79)      | 1.19x10 <sup>-6</sup> |
| Serum Creatinine    | 1.53 (1.33-1.76) | 1.67x10 <sup>-9</sup>  | 1.32 (1.13-1.55)    | 0.0007                | 1.28 (1.09-1.50) | 0.003                 | 1.29 (1.09-1.52)      | 0.003                 |
| UACR                | 1.52 (1.36-1.70) | 1.66x10 <sup>-13</sup> | 1.46 (1.29-1.65)    | 1.08x10 <sup>-8</sup> | 1.39 (1.23-1.57) | 1.79x10 <sup>-7</sup> | 1.35 (1.19-1.53)      | 2.07x10 <sup>-6</sup> |
| eGFR                | 0.68 (0.60-0.78) | 3.37x10 <sup>-8</sup>  | 0.76 (0.65-0.89)    | 0.0006                | 0.77 (0.66-0.90) | 0.002                 | 0.77 (0.65-0.91)      | 0.003                 |
| CVD Mortality       |                  |                        |                     |                       |                  |                       |                       |                       |
| Serum Albumin       | 0.79 (0.64-0.96) | 0.02                   | 0.78 (0.63-0.96)    | 0.02                  | 0.75 (0.60-0.94) | 0.01                  | 0.77 (0.61-0.98)      | 0.03                  |
| Serum Creatinine    | 1.74 (1.40-2.15) | 6.13x10 <sup>-7</sup>  | 1.55 (1.20-1.99)    | 0.0007                | 1.44 (1.13-1.85) | 0.004                 | 1.49 (1.15-1.92)      | 0.003                 |
| UACR                | 1.71 (1.47-1.99) | 2.16x10 <sup>-12</sup> | 1.63 (1.38-1.92)    | 1.33x10 <sup>-9</sup> | 1.52 (1.28-1.80) | 2.33x10 <sup>-6</sup> | 1.47 (1.24-1.74)      | 1.03x10 <sup>-5</sup> |
| eGFR                | 0.63 (0.52-0.78) | 1.95x10 <sup>-5</sup>  | 0.68 (0.54-0.86)    | 0.001                 | 0.71 (0.56-0.90) | 0.006                 | 0.68 (0.53-0.89)      | 0.004                 |

UACR=urine albumin:creatinine ratio; eGFR=estimated glomerular filtration rate.

\*adjusted for age, sex, type 2 diabetes affection status, ACE/ARB medication use; † adjusted for age, sex, type 2 diabetes affection status, body mass index, current smoking, hypertension, dyslipidemia, ACE/ARB medication use, prior cardiovascular disease

**Table 3**

Association between categorical measures of kidney disease and all-cause mortality and cardiovascular disease (CVD) mortality **for T2D affected individuals only**.

|             | Quartiles | Quartile Ranges | All-cause mortality |         | CVD-mortality    |                       |
|-------------|-----------|-----------------|---------------------|---------|------------------|-----------------------|
|             |           |                 | HR (95% CI)         | p-value | HR (95% CI)      | p-value               |
| Serum       | Q1-Q3     | 3.2-4.4         |                     |         |                  |                       |
| Albumin†    | Q4        | 4.4-5.3         | 1.70 (1.25-2.33)    | 0.0009  | 1.44 (0.89-2.35) | 0.14                  |
| Serum       | Q1-Q3     | 0.4-1.2         |                     |         |                  |                       |
| Creatinine* | Q4        | 1.2-1.75        | 1.30 (0.94-1.80)    | 0.11    | 1.88 (1.16-3.05) | 0.01                  |
| UACR*       | Q1-Q3     | 0.5-44.5        |                     |         |                  |                       |
|             | Q4        | 44.5-4165.0     | 1.68 (1.25-2.65)    | 0.0005  | 2.52 (1.68-3.78) | 7.95x10 <sup>-6</sup> |
| eGFR†       | Q1-Q3     | 20.0-74.9       |                     |         |                  |                       |
|             | Q4        | 74.9-179.9      | 1.64 (1.19-2.27)    | 0.003   | 1.98 (1.24-3.16) | 0.004                 |

UACR=urine albumin:creatinine ratio; eGFR=estimated glomerular filtration rate.

Associations based on proportional hazards regression models adjusted for age, sex, type 2 diabetes affection status, body mass index, current smoking, hypertension, dyslipidemia, ACE/ARB medication use, prior CVD and coronary artery calcified plaque.

\*For serum creatinine and UACR, quartiles were established based on increasing values across the distribution such that quartile 4 (Q4) captures the highest risk individuals. †For serum albumin and eGFR, quartiles were established based on decreasing values across the distribution such that Q4 again captures the highest risk individuals.

**Table 4**

Area under the curve (AUC) analysis for models predicting all-cause and cardiovascular disease (CVD) mortality.

| Models                         | All-cause mortality |         | CVD-mortality |         |
|--------------------------------|---------------------|---------|---------------|---------|
|                                | AUC                 | p-value | AUC           | p-value |
| <b>Serum Albumin</b>           |                     |         |               |         |
| Traditional                    | 0.729               | -       | 0.734         | -       |
| Traditional + Albumin          | 0.752               | 0.008*  | 0.747         | 0.15*   |
| Traditional + CAC              | 0.762               | 0.001*  | 0.770         | 0.008*  |
| Traditional + Albumin + CAC    | 0.781               | 0.02†   | 0.778         | 0.21†   |
| <b>Serum Creatinine</b>        |                     |         |               |         |
| Traditional                    | 0.736               | -       | 0.740         | -       |
| Traditional + Creatinine       | 0.734               | 0.75*   | 0.748         | 0.48*   |
| Traditional + CAC              | 0.769               | 0.0008* | 0.776         | 0.005*  |
| Traditional + Creatinine + CAC | 0.770               | 0.96†   | 0.784         | 0.40†   |
| <b>eGFR</b>                    |                     |         |               |         |
| Traditional                    | 0.736               | -       | 0.740         | -       |
| Traditional + eGFR             | 0.734               | 0.694*  | 0.748         | 0.45*   |
| Traditional + CAC              | 0.769               | 0.0008* | 0.776         | 0.005*  |
| Traditional + eGFR + CAC       | 0.770               | 0.87†   | 0.785         | 0.353†  |
| <b>UACR</b>                    |                     |         |               |         |
| Traditional                    | 0.738               | -       | 0.737         | -       |
| Traditional + UACR             | 0.754               | 0.06*   | 0.767         | 0.03*   |
| Traditional + CAC              | 0.771               | 0.001*  | 0.772         | 0.006*  |
| Traditional + UACR + CAC       | 0.783               | 0.09†   | 0.795         | 0.06†   |

CAC = coronary artery calcified plaque; UACR=urine albumin:creatinine ratio; eGFR=estimated glomerular filtration rate. Models include traditional CVD risk factors with addition of a measure of kidney disease (either serum Albumin, serum Creatinine, eGFR or UACR), addition of CAC, or addition of both measures of kidney disease and CAC. \*p-values are for comparisons to models containing traditional risk factors only; †p-values are for comparison to models containing traditional risk factors and CAC



**Table 5**

Association between measures of kidney function (quartiles 1-4; Q1-4) and all-cause mortality as assessed using proportional hazard regression with covariate adjustment as indicated.

|            |          | Unadjusted       |                        | Partially Adjusted* |                       | Fully Adjusted†  |                       | Fully Adjusted† + CAC |                       |
|------------|----------|------------------|------------------------|---------------------|-----------------------|------------------|-----------------------|-----------------------|-----------------------|
|            |          | HR (95%CI)       | p-value                | HR (95%CI)          | p-value               | HR (95%CI)       | p-value               | HR (95%CI)            | p-value               |
| Albumin    | Q1 (Ref) | 1.00             | -                      | 1.00                | -                     | 1.00             | -                     | 1.00                  | -                     |
|            | Q2       | 1.25 (0.84-1.86) | 0.28                   | 1.35 (0.91-1.98)    | 0.13                  | 1.33 (0.91-1.95) | 0.14                  | 1.27 (0.86-1.88)      | 0.22                  |
|            | Q3       | 1.66 (1.13-2.44) | 0.01                   | 1.75 (1.20-2.56)    | 0.004                 | 1.70 (1.15-2.50) | 0.008                 | 1.66 (1.12-2.17)      | 0.01                  |
|            | Q4       | 1.81 (1.24-2.66) | 0.002                  | 1.93 (1.33-2.81)    | 0.0006                | 2.01 (1.38-2.93) | 0.0003                | 2.03 (1.38-3.00)      | 0.0003                |
| Creatinine | Q1 (Ref) | 1.00             | -                      | 1.00                | -                     | 1.00             | -                     | 1.00                  | -                     |
|            | Q2       | 1.34 (0.85-2.10) | 0.20                   | 1.21 (0.77-1.92)    | 0.41                  | 1.20 (0.77-1.88) | 0.43                  | 1.38 (0.85-2.25)      | 0.20                  |
|            | Q3       | 1.72 (1.04-2.82) | 0.03                   | 1.34 (0.81-2.24)    | 0.26                  | 1.24 (0.74-2.06) | 0.42                  | 1.47 (0.84-2.57)      | 0.17                  |
|            | Q4       | 2.77 (1.80-4.25) | 2.72x10 <sup>-6</sup>  | 1.75 (1.07-2.86)    | 0.03                  | 1.65 (1.01-2.70) | 0.05                  | 1.82 (1.07-3.11)      | 0.03                  |
| UACR       | Q1 (Ref) | 1.00             | -                      | 1.00                | -                     | 1.00             | -                     | 1.00                  | -                     |
|            | Q2       | 1.62 (1.06-2.48) | 0.02                   | 1.55 (1.03-2.34)    | 0.04                  | 1.42 (0.95-2.14) | 0.09                  | 1.59 (1.03-2.45)      | 0.04                  |
|            | Q3       | 1.84 (1.21-2.80) | 0.005                  | 1.49 (0.98-2.27)    | 0.07                  | 1.36 (0.89-2.09) | 0.15                  | 1.55 (0.99-2.43)      | 0.06                  |
|            | Q4       | 3.82 (2.60-5.63) | 1.05x10 <sup>-11</sup> | 2.89 (1.95-4.28)    | 1.34x10 <sup>-7</sup> | 2.44 (1.64-3.63) | 1.01x10 <sup>-5</sup> | 2.53 (1.68-3.82)      | 8.98x10 <sup>-6</sup> |

| eGFR | Q1 (Ref) | 1.00             | -                     | 1.00             | -      | 1.00             | -     | 1.00             | -     |
|------|----------|------------------|-----------------------|------------------|--------|------------------|-------|------------------|-------|
|      | Q2       | 1.51 (1.02-2.22) | 0.04                  | 1.38 (0.94-2.02) | 0.09   | 1.36 (0.93-2.00) | 0.11  | 1.58 (1.05-2.38) | 0.03  |
|      | Q3       | 1.53 (1.02-2.28) | 0.04                  | 1.24 (0.83-1.85) | 0.25   | 1.17 (0.78-1.77) | 0.45  | 1.26 (0.82-1.96) | 0.30  |
|      | Q4       | 2.92 (1.99-4.27) | 2.31x10 <sup>-8</sup> | 2.03 (1.35-3.04) | 0.0007 | 1.85 (1.22-2.82) | 0.004 | 2.02 (1.30-3.16) | 0.002 |

UACR=urine albumin:creatinine ratio; eGFR=estimated glomerular filtration rate.

\*adjusted for age, sex, type 2 diabetes affection status, ACE/ARB medication use; † adjusted for age, sex, type 2 diabetes affection status, body mass index, current smoking, hypertension, dyslipidemia, ACE/ARB medication use, prior cardiovascular disease

**Table 6**

Association between measures of kidney function (quartiles 1-4; Q1-4) and all-cause mortality as assessed using proportional hazard regression with covariate adjustment as indicated.

|            |          | Unadjusted        |                       | Partially Adjusted* |                       | Fully Adjusted†  |                       | Fully Adjusted† + CAC |                       |
|------------|----------|-------------------|-----------------------|---------------------|-----------------------|------------------|-----------------------|-----------------------|-----------------------|
|            |          | HR (95%CI)        | p-value               | HR (95%CI)          | p-value               | HR (95%CI)       | p-value               | HR (95%CI)            | p-value               |
| Albumin    | Q1 (Ref) | 1.00              | -                     | 1.00                | -                     | 1.00             | -                     | 1.00                  | -                     |
|            | Q2       | 1.08 (0.59-1.98)  | 0.80                  | 1.19 (0.66-2.14)    | 0.56                  | 1.16 (0.64-2.07) | 0.63                  | 1.19 (0.66-2.12)      | 0.56                  |
|            | Q3       | 1.47 (0.83-2.61)  | 0.19                  | 1.56 (0.88-2.75)    | 0.13                  | 1.65 (0.92-2.94) | 0.09                  | 1.57 (0.89-2.79)      | 0.12                  |
|            | Q4       | 1.53 (0.85-2.76)  | 0.16                  | 1.64 (0.91-2.96)    | 0.10                  | 1.76 (0.97-3.18) | 0.06                  | 1.69 (0.93-3.10)      | 0.09                  |
| Creatinine | Q1 (Ref) | 1.00              | -                     | 1.00                | -                     | 1.00             | -                     | 1.00                  | -                     |
|            | Q2       | 1.09 (0.56-2.12)  | 0.80                  | 0.95 (0.48-1.87)    | 0.88                  | 0.96 (0.49-1.87) | 0.89                  | 1.01 (0.50-2.04)      | 0.98                  |
|            | Q3       | 1.09 (0.49-2.42)  | 0.83                  | 0.86 (0.39-1.89)    | 0.86                  | 0.76 (0.34-1.66) | 0.49                  | 0.85 (0.38-1.90)      | 0.69                  |
|            | Q4       | 3.03 (1.68-5.47)  | 0.0002                | 2.02 (1.01-4.02)    | 0.05                  | 1.83 (0.91-3.72) | 0.09                  | 1.92 (0.92-4.00)      | 0.08                  |
| UACR       | Q1 (Ref) | 1.00              | -                     | 1.00                | -                     | 1.00             | -                     | 1.00                  | -                     |
|            | Q2       | 2.68 (1.27-5.65)  | 0.01                  | 2.62 (1.25-5.50)    | 0.01                  | 2.44 (1.17-5.08) | 0.02                  | 2.59 (1.18-5.68)      | 0.02                  |
|            | Q3       | 3.01 (1.41-6.42)  | 0.004                 | 2.45 (1.13-5.31)    | 0.02                  | 2.27 (1.05-4.94) | 0.04                  | 2.43 (1.09-5.42)      | 0.03                  |
|            | Q4       | 7.67 (3.84-15.31) | 7.64x10 <sup>-9</sup> | 5.73 (2.81-11.68)   | 1.57x10 <sup>-6</sup> | 4.72 (2.29-9.73) | 2.58x10 <sup>-5</sup> | 4.84 (2.35-9.99)      | 1.97x10 <sup>-5</sup> |

| eGFR | Q1 (Ref) | 1.00             | -                     | 1.00             | -     | 1.00             | -    | 1.00             | -    |
|------|----------|------------------|-----------------------|------------------|-------|------------------|------|------------------|------|
|      | Q2       | 1.29 (0.72-2.28) | 0.39                  | 1.18 (0.67-2.10) | 0.57  | 1.11 (0.62-1.99) | 0.74 | 1.20 (0.64-2.23) | 0.57 |
|      | Q3       | 1.37 (0.78-2.43) | 0.27                  | 1.16 (0.64-2.11) | 0.62  | 1.02 (0.55-1.90) | 0.95 | 1.03 (0.54-1.95) | 0.94 |
|      | Q4       | 3.01 (1.18-5.10) | 4.05x10 <sup>-5</sup> | 2.34 (1.29-4.25) | 0.005 | 2.00 (1.09-3.69) | 0.03 | 2.07 (1.10-3.90) | 0.02 |

UACR=urine albumin:creatinine ratio; eGFR=estimated glomerular filtration rate.

\*adjusted for age, sex, type 2 diabetes affection status, ACE/ARB medication use; † adjusted for age, sex, type 2 diabetes affection status, body mass index, current smoking, hypertension, dyslipidemia, ACE/ARB medication use, prior cardiovascular disease
